# Supplementary material for: Knowing the gap: medication use, adherence and blood pressure control among patients with hypertension in Indonesian primary care settings
Source: PeerJ journal article supplement (doi:10.7717/peerj.13171), 2022-03-25
Supplement: DATA_COLLECTION_TOOL.pdf [file DATA_COLLECTION_TOOL.pdf]

## DATA COLLECTION TOOL

| SECTION A: Patient characteristics                                                                                                 |                                                                                                                                                                                                                       |                             |
|------------------------------------------------------------------------------------------------------------------------------------|-----------------------------------------------------------------------------------------------------------------------------------------------------------------------------------------------------------------------|-----------------------------|
| <b>Sociodemographic</b><br>(Note: data collected from patient interview)                                                           |                                                                                                                                                                                                                       |                             |
| Year of birth:                                                                                                                     | .....                                                                                                                                                                                                                 |                             |
| Gender:                                                                                                                            | <input type="checkbox"/> Male<br><input type="checkbox"/> Female                                                                                                                                                      |                             |
| Level of education:                                                                                                                | <input type="checkbox"/> No<br><input type="checkbox"/> Primary level<br><input type="checkbox"/> Lower secondary level<br><input type="checkbox"/> Upper secondary<br><input type="checkbox"/> University level      |                             |
| Occupation:                                                                                                                        | <input type="checkbox"/> Housewife<br><input type="checkbox"/> Civil servant<br><input type="checkbox"/> Private sector employee<br><input type="checkbox"/> Private employer<br><input type="checkbox"/> Not working |                             |
| Income:                                                                                                                            | <input type="checkbox"/> <1 million IDR<br><input type="checkbox"/> 1-2 million IDR<br><input type="checkbox"/> 2-3 million IDR<br><input type="checkbox"/> >3 million IDR                                            |                             |
| <b>Antihypertensive drug use</b><br>(Note: data collected from patient prescription)                                               |                                                                                                                                                                                                                       |                             |
| <b>Name of antihypertensive drug</b>                                                                                               | <b>Dose</b>                                                                                                                                                                                                           | <b>Frequency</b>            |
| 1.....                                                                                                                             | .....                                                                                                                                                                                                                 | .....                       |
| 2.....                                                                                                                             | .....                                                                                                                                                                                                                 | .....                       |
| <i>(add more rows when needed)</i>                                                                                                 |                                                                                                                                                                                                                       |                             |
| SECTION B: Adherence                                                                                                               |                                                                                                                                                                                                                       |                             |
| <b>(Note: data collected from patient interview)</b>                                                                               |                                                                                                                                                                                                                       |                             |
| Q1: Do you ever forget to take your hypertensive medication?                                                                       | <input type="checkbox"/> Yes                                                                                                                                                                                          | <input type="checkbox"/> No |
| Q2: Do you ever have problems remembering to take your hypertensive medication?                                                    | <input type="checkbox"/> Yes                                                                                                                                                                                          | <input type="checkbox"/> No |
| Q3: When you feel better, do you sometimes stop taking your hypertensive medication?                                               | <input type="checkbox"/> Yes                                                                                                                                                                                          | <input type="checkbox"/> No |
| Q4: Sometimes if you feel worse when you take your hypertensive medication, do you stop taking it?                                 | <input type="checkbox"/> Yes                                                                                                                                                                                          | <input type="checkbox"/> No |
| SECTION C: Lifestyle modifications                                                                                                 |                                                                                                                                                                                                                       |                             |
| <b>Salt intake behaviour</b><br>(Note: data collected from patient interview)                                                      |                                                                                                                                                                                                                       |                             |
| Q1: "In the past 7 days, how often did you eat salty foods (such as salted fish, processed meat, instant noodles or salty snack)?" | <input type="checkbox"/> Never/rarely<br><input type="checkbox"/> Occasionally                                                                                                                                        |                             |

|                                                                                                                                                                                         |                                                           |                                                                                                                      |
|-----------------------------------------------------------------------------------------------------------------------------------------------------------------------------------------|-----------------------------------------------------------|----------------------------------------------------------------------------------------------------------------------|
|                                                                                                                                                                                         |                                                           | <input type="checkbox"/> Regularly                                                                                   |
| Q2: "In the past 7 days, how often did you use condiments/seasonings (such as sweet soy sauce, monosodium glutamate, premix seasoning, chili sauce or shrimp/fish paste) in your food?" |                                                           | <input type="checkbox"/> Never/rarely<br><input type="checkbox"/> Occasionally<br><input type="checkbox"/> Regularly |
| <b>Physical activity</b><br>(Note: data collected from patient interview)                                                                                                               |                                                           |                                                                                                                      |
| Q1: In the past 7 days, how many times did you do physical activity (including what you do around the house or as part of your work)?                                                   |                                                           |                                                                                                                      |
| <b>Day</b>                                                                                                                                                                              | <b>Type of Activity</b>                                   | <b>Duration</b>                                                                                                      |
| 1                                                                                                                                                                                       | 1.....<br>2 .....<br>.....<br>(add more rows when needed) | ..... min<br>..... min<br>..... min                                                                                  |
| 2                                                                                                                                                                                       |                                                           |                                                                                                                      |
| 3                                                                                                                                                                                       |                                                           |                                                                                                                      |
| 4                                                                                                                                                                                       |                                                           |                                                                                                                      |
| 5                                                                                                                                                                                       |                                                           |                                                                                                                      |
| 6                                                                                                                                                                                       |                                                           |                                                                                                                      |
| 7                                                                                                                                                                                       |                                                           |                                                                                                                      |
| <b>Smoking</b><br>(Note: data collected from patient interview)                                                                                                                         |                                                           |                                                                                                                      |
| Q1: In the past 7 days, how many times did you smoke a cigarette, even just one puff?                                                                                                   |                                                           | ..... times                                                                                                          |
| <b>Alcohol</b><br>(Note: data collected from patient interview)                                                                                                                         |                                                           |                                                                                                                      |
| Q1: In the past 7 days, how many times did you drink alcohol?                                                                                                                           |                                                           | ..... times                                                                                                          |
| <b>Body Mass Index (BMI)</b><br>(Note: data collected from patient record)□                                                                                                             |                                                           |                                                                                                                      |
| Height: ..... metres<br>Weight: ..... kilograms<br>BMI = weight (kg)/ height (m) <sup>2</sup>                                                                                           |                                                           | ..... kg/m <sup>2</sup>                                                                                              |
| <b>BP measurement</b>                                                                                                                                                                   |                                                           |                                                                                                                      |
| Diastole:                                                                                                                                                                               |                                                           | ..... mmHg                                                                                                           |
| Systole :                                                                                                                                                                               |                                                           | ..... mmHg                                                                                                           |
| <b>(Note: data collected from patient record)</b>                                                                                                                                       |                                                           |                                                                                                                      |
