# Supplementary material for: Knowing the gap: medication use, adherence and blood pressure control among patients with hypertension in Indonesian primary care settings
Source: PeerJ. 2022 Mar 25;10:e13171. doi: 10.7717/peerj.13171 (PMC8958961; doi:10.7717/peerj.13171)
Supplement: Supplemental Information 2 [file peerj-10-13171-s002.xlsx]

## Sheet: Sheet1
Patient code	PHC group code	Age	Gender	Education	Occupation	Income	HT duration	Smoking	Alcohol	BMI	Family History	physical activity		salty food	add salt	DM	CV complications	medication1	dose	frequency	medication2	adherence (mgls)	SBP	DBP	control BP
w1	1.00	54	2.00	1	1	2	2	2.00	2	3	2	2		3.00	3.00	1.00	2	Amlodipin	5	1x1		2	122.00	79.00	1.00
2	1.00	52	2.00	2	1	2	2	2.00	2	5	1	2		2.00	2.00	1.00	2	Amlodipin	5	1x1		1	120.00	72.00	1.00
3	1.00	67	2.00	1	4	2	2	2.00	2	4	2	2		1.00	2.00	1.00	1	Amlodipin	5	1x1		2	127.00	77.00	1.00
4	1.00	56	2.00	1	4	2	2	2.00	2	5	1	2		1.00	3.00	2.00	2	Amlodipin	10	1x1		1	111.00	70.00	1.00
5	1.00	49	2.00	1	1	3	3	2.00	2	5	1	2		3.00	3.00	1.00	2	Amlodipin	5	1x1		2	120.00	79.00	1.00
6	1.00	71	2.00	3	1	2	2	2.00	2	3	3	2		2.00	3.00	2.00	2	Amlodipin	5	1x1		2	125.00	76.00	1.00
7	1.00	80	2.00	3	1	1	3	2.00	2	3	1	2		2.00	3.00	2.00	2	Amlodipin	5	1x1		2	120.00	73.00	1.00
8	1.00	66	2.00	5	1	1	3	2.00	2	3	2	2		1.00	1.00	1.00	2	Amlodipin	5	1x1		2	127.00	79.00	1.00
9	1.00	50	2.00	2	1	2	3	2.00	2	4	1	2		3.00	3.00	2.00	2	Amlodipin	5	1x1		2	160.00	98.00	2.00
10	1.00	50	1.00	4	3	4	3	1.00	2	3	1	2		1.00	1.00	2.00	2	Amlodipin	5	1x1		3	180.00	90.00	2.00
11	1.00	58	1.00	2	4	4	2	1.00	2	5	2	2		2.00	2.00	2.00	2	Amlodipin	10	1x1	HCT 25 1x1	2	126.00	99.00	2.00
12	1.00	67	2.00	1	1	1	3	2.00	2	3	1	2		1.00	1.00	1.00	2	Amlodipin	10	1x1		3	150.00	91.00	2.00
13	1.00	41	2.00	3	1	3	2	2.00	2	5	1	2		1.00	3.00	2.00	2	Amlodipin	10	1x1		3	130.00	79.00	1.00
14	1.00	54	1.00	3	4	4	2	1.00	2	5	1	2		1.00	3.00	1.00	2	Amlodipin	10	1x1		2	147.00	91.00	2.00
15	1.00	51	1.00	3	3	2	3	1.00	2	5	1	2		1.00	1.00	2.00	2	Amlodipin	5	1x1		2	144.00	97.00	2.00
16	1.00	64	2.00	1	1	3	3	2.00	2	3	2	2		1.00	1.00	1.00	2	Amlodipin	5	1x1		2	120.00	90.00	2.00
17	1.00	67	2.00	1	4	2	1	2.00	2	2	1	2		3.00	2.00	2.00	2	Amlodipin	5	1x1		2	127	73	1.00
18	1.00	75	2.00	4	5	4	3	2.00	2	3	2	1		1.00	1.00	2.00	2	Amlodipin	10	1x1		2	123.00	79	1.00
19	1.00	67	2.00	1	1	1	3	2.00	2	3	3	2		1.00	3.00	2.00	2	Amlodipin	10	1x1		1	128.00	79	1.00
20	1.00	61	2.00	3	1	2	3	2.00	2	5	1	2		1.00	1.00	1.00	2	Amlodipin	5	1x1		2	111.00	70	1.00
21	1.00	57	1.00	3	4	4	2	1.00	2	3	1	2		2.00	2.00	2.00	2	Amlodipin	10	1x1		3	150.00	92.00	2.00
22	1.00	59	1.00	1	3	2	3	1.00	2	3	1	2		1.00	1.00	2.00	2	Amlodipin	5	1x1		3	161.00	97.00	2.00
23	1.00	64	2.00	3	1	4	3	2.00	2	3	2	2		1.00	1.00	2.00	2	Amlodipin	5	1x1		2	123.00	77	1.00
24	1.00	55	2.00	3	1	3	3	2.00	2	3	1	1		1.00	1.00	2.00	2	Amlodipin	5	1x1		2	128.00	79	1.00
25	1.00	46	2.00	1	1	3	2	2.00	2	3	1	2		1.00	3.00	2.00	2	Amlodipin	5	1x1		2	120.00	75	1.00
26	1.00	53	1.00	4	4	3	2	1.00	2	5	1	2		1.00	3.00	2.00	2	Amlodipin	10	1x1		2	149.00	91.00	2.00
27	1.00	59	2.00	3	1	2	2	2.00	2	3	2	2		1.00	2.00	2.00	2	Amlodipin	5	1x1		1	122.00	79	1.00
28	1.00	42	2.00	1	1	3	1	2.00	2	4	2	2		1.00	2.00	2.00	2	Amlodipin	5	1x1		2	157.00	92.00	2.00
29	1.00	52	1.00	3	3	2	3	2.00	2	5	1	2		1.00	1.00	2.00	2	Amlodipin	5	1x1		2	112.00	77	1.00
30	1.00	43	2.00	2	3	2	2	2.00	2	3	1	2		3.00	3.00	2.00	2	Amlodipin	5	1x1		2	145.00	90.00	2.00
31	1.00	50	2.00	2	1	4	2	2.00	2	5	2	2		1.00	3.00	1.00	2	Amlodipin	10	1x1		3	151.00	94.00	2.00
32	1.00	45	2.00	3	1	4	2	2.00	2	5	1	2		1.00	2.00	2.00	2	Amlodipin	5	1x1		2	100.00	66.00	1.00
33	1.00	66	1.00	1	3	3	2	1.00	2	3	2	2		3.00	2.00	2.00	1	Amlodipin	5	1x1		3	128.00	79	1.00
34	1.00	51	1.00	2	3	2	2	1.00	2	5	1	2		1.00	1.00	2.00	2	Amlodipin	5	1x1		2	120.00	75	1.00
35	1.00	53	1.00	3	3	4	2	1.00	2	3	2	2		2.00	1.00	2.00	2	Amlodipin	5	1x1		3	140.00	82.00	2.00
36	1.00	53	2.00	1	1	1	2	2.00	2	3	1	2		1.00	2.00	1.00	2	Amlodipin	5	1x1		2	118.00	78.00	1.00
37	1.00	50	2.00	2	1	3	2	2.00	2	5	1	2		1.00	3.00	1.00	2	Amlodipin	10	1x1		2	127.00	79.00	1.00
38	1.00	50	2.00	2	4	3	3	2.00	2	5	1	2		3.00	3.00	2.00	2	Amlodipin	10	1x1		2	120.00	78.00	1.00
39	1.00	30	2.00	3	3	4	3	1.00	1	5	1	2		1.00	2.00	2.00	2	Amlodipin	10	1x1	HCT 25 1x1	2	160.00	110.00	2.00
40	1.00	64	1.00	1	4	2	3	1.00	2	4	2	2		2.00	2.00	2.00	2	Amlodipin	5	1x1		1	150.00	101.00	2.00
41	1.00	58	2.00	1	1	3	2	2.00	2	3	1	2		1.00	2.00	2.00	2	Amlodipin	5	1x1		2	130.00	93.00	2.00
42	1.00	51	2.00	3	3	4	2	2.00	2	3	1	2		2.00	3.00	1.00	2	Amlodipin	10	1x1		2	161.00	104.00	2.00
43	1.00	76	1.00	4	5	3	3	1.00	2	4	1	2		1.00	2.00	2.00	2	Amlodipin	5	1x1		2	140.00	79.00	2.00
44	1.00	60	2.00	3	1	3	3	2.00	2	3	1	2		1.00	1.00	1.00	2	Amlodipin	5	1x1		2	110.00	74.00	1.00
45	1.00	68	2.00	2	1	2	2	2.00	2	5	1	2		2.00	3.00	2.00	2	Amlodipin	5	1x1		2	129.00	77.00	1.00
46	1.00	71	1.00	3	4	3	2	1.00	2	4	2	2		1.00	1.00	2.00	2	Amlodipin	5	1x1		2	115.00	70.00	1.00
47	1.00	49	2.00	4	1	4	2	2.00	2	5	1	2		3.00	1.00	2.00	2	Amlodipin	5	1x1		3	129.00	76.00	1.00
48	1.00	78	1.00	4	3	4	3	1.00	2	3	1	2		2.00	1.00	1.00	2	Amlodipin	10	1x1		2	120.00	78.00	1.00
49	1.00	46	2.00	4	3	4	3	2.00	2	4	1	1		1.00	2.00	2.00	2	Amlodipin	5	1x1		2	121.00	74.00	1.00
50	1.00	67	1.00	1	4	2	2	1.00	2	3	1	2		2.00	2.00	2.00	2	Amlodipin	5	1x1		2	125.00	79.00	1.00
y1	2.00	52	2.00	2	1	3	2	2.00	2	5	3	2		2.00	3.00	1.00	2	amlodipine	5	1 x 1		1	140.00	87.00	2.00
2	2.00	39	2.00	2	1	3	2	2.00	2	4	1	2		1.00	3.00	2.00	2	amlodipine	5	1 x 1		1	139.00	80.00	2.00
3	2.00	54	2.00	1	1	1	2	2.00	2	5	2	2		1.00	1.00	1.00	2	HCT	25	1 x 1		2	130.00	82.00	1.00
4	2.00	58	2.00	1	1	1	2	2.00	2	3	1	2		1.00	3.00	2.00	2	amlodipine	5	1 x 1		1	126.00	62.00	1.00
5	2.00	64	2.00	1	1	1	2	2.00	2	3	2	1		1.00	2.00	2.00	2	amlodipine	10	1 x 1		1	130.00	78.00	1.00
6	2.00	71	1.00	1	3	2	2	2.00	2	3	1	1		1.00	2.00	2.00	2	nifedipin	10	2 x 1		3	144.00	91.00	2.00
7	2.00	48	2.00	3	1	4	3	2.00	2	3	1	2		2.00	3.00	2.00	2	amlodipine	5	1 x 1		3	130.00	77.00	1.00
8	2.00	79	1.00	2	5	3	3	2.00	2	3	2	1		2.00	3.00	2.00	1	amlodipine	5	1 x 1		2	140.00	84.00	2.00
9	2.00	54	2.00	1	1	1	2	2.00	2	3	1	2		1.00	3.00	1.00	2	amlodipine	5	1 x 1		2	123.00	78.00	1.00
10	2.00	64	1.00	1	4	1	3	2.00	2	4	1	2		1.00	3.00	2.00	1	amlodipine	5	2 x 1	HCT 25 1X1	1	182.00	98.00	2.00
11	2.00	47	2.00	5	1	1	3	2.00	2	3	2	2		1.00	3.00	2.00	2	bisoprolol	5	1 x 1		2	130.00	79.00	1.00
12	2.00	78	2.00	1	1	1	3	2.00	2	3	2	2		3.00	3.00	2.00	2	amlodipine	5	1 x 1		1	129.00	75.00	1.00
13	2.00	53	2.00	2	1	2	2	2.00	2	4	1	2		1.00	3.00	2.00	2	amlodipine	5	1 x 1		1	142.00	87.00	2.00
14	2.00	60	2.00	1	1	1	1	2.00	2	5	1	2		2.00	3.00	2.00	2	amlodipine	5	1 x 1	HCT 25 1X1	3	161.00	85.00	2.00
15	2.00	54	2.00	5	1	1	2	2.00	2	5	2	2		1.00	3.00	2.00	2	amlodipine	5	1 x 1	HCT 25 1X1	1	146.00	81.00	2.00
16	2.00	69	1.00	1	5	1	2	1.00	2	3	2	2		3.00	3.00	2.00	2	captopril	5	1 x 1		1	132.00	90.00	2.00
17	2.00	43	2.00	3	1	4	2	2.00	2	5	1	2		1.00	3.00	2.00	2	amlodipine	10	1 x 1		3	150.00	82.00	2.00
18	2.00	63	1.00	3	1	1	3	1.00	2	5	2	2		1.00	3.00	1.00	2	amlodipine	10	1 x 1		1	152.00	95.00	2.00
19	2.00	65	1.00	1	4	1	2	1.00	2	3	2	2		1.00	3.00	2.00	2	amlodipine	10	1 x 1	HCT 25 1X1	2	160.00	94.00	2.00
20	2.00	55	2.00	5	4	2	3	1.00	2	5	1	2		3.00	3.00	2.00	2	amlodipine	5	1 x 1		2	147.00	89.00	2.00
21	2.00	58	1.00	1	3	3	2	1.00	2	5	2	2		1.00	1.00	1.00	2	amlodipine	5	1 x 1		1	153.00	80.00	2.00
22	2.00	49	2.00	1	1	3	2	2.00	2	5	1	2		2.00	3.00	2.00	2	amlodipine	5	1 x 1		2	132.00	88.00	2.00
23	2.00	68	2.00	5	1	1	2	2.00	2	3	2	2		1.00	3.00	2.00	2	amlodipine	5	1 x 1		2	137.00	90.00	2.00
24	2.00	59	1.00	3	5	3	1	2.00	2	3	2	2		2.00	3.00	2.00	2	amlodipine	5	1 x 1		1	150.00	97.00	2.00
25	2.00	53	1.00	3	5	3	2	1.00	2	5	2	1		1.00	3.00	2.00	2	amlodipine	5	1 x 1		1	122.00	76.00	1.00
26	2.00	78	1.00	1	5	1	2	1.00	2	2	3	2		1.00	3.00	2.00	2	amlodipine	5	1 x 1		2	140.00	92.00	2.00
27	2.00	57	2.00	5	1	1	2	2.00	2	4	2	2		1.00	3.00	2.00	2	amlodipine	10	1 x 1		2	174.00	101.00	2.00
28	2.00	73	1.00	1	5	1	1	2.00	2	3	2	2		1.00	3.00	2.00	2	amlodipine	10	1 x 1		1	170.00	67.00	2.00
29	2.00	48	1.00	4	3	4	2	2.00	2	5	2	2		1.00	3.00	2.00	2	amlodipine	5	1 x 1		3	147.00	82.00	2.00
30	2.00	65	1.00	1	4	2	2	1.00	2	5	2	2		1.00	3.00	2.00	2	amlodipine	10	1 x 1		2	161.00	80.00	2.00
31	2.00	72	2.00	1	1	1	3	2.00	2	3	3	2		1.00	3.00	2.00	2	amlodipine	5	1 x 1		1	130.00	89.00	2.00
32	2.00	64	2.00	5	4	2	3	2.00	2	5	2	2		1.00	3.00	2.00	2	amlodipine	10	1 x 1		1	147.00	92.00	2.00
33	2.00	55	1.00	3	5	3	2	2.00	2	5	2	2		1.00	3.00	2.00	2	amlodipine	5	1 x 1		2	142.00	87.00	2.00
34	2.00	58	2.00	1	4	1	3	2.00	2	3	2	2		1.00	2.00	2.00	2	amlodipine	5	1 x 1		3	139.00	91.00	2.00
35	2.00	37	2.00	1	4	2	2	2.00	2	5	1	2		2.00	3.00	2.00	2	amlodipine	10	1 x 1		2	140.00	82.00	2.00
36	2.00	72	2.00	1	1	2	3	2.00	2	3	3	2		1.00	3.00	2.00	2	amlodipine	5	1 x 1		1	135.00	97.00	2.00
37	2.00	49	2.00	1	4	4	3	2.00	2	5	2	2		1.00	3.00	2.00	2	amlodipine	5	1 x 1		1	142.00	90.00	2.00
38	2.00	57	1.00	1	5	1	3	1.00	2	4	2	2		1.00	3.00	2.00	2	amlodipine	5	1 x 1		3	150.00	97.00	2.00
39	2.00	59	1.00	1	5	1	3	1.00	2	4	2	2		2.00	3.00	2.00	2	amlodipine	5	1 x 1		1	155.00	92.00	2.00
40	2.00	49	1.00	3	5	4	2	1.00	2	4	1	2		3.00	3.00	2.00	2	amlodipine	10	1 x 1		3	171.00	101.00	2.00
41	2.00	44	2.00	1	1	1	2	2.00	2	5	1	2		3.00	3.00	2.00	2	amlodipine	10	1 x 1		1	140.00	74.00	2.00
42	2.00	67	2.00	3	1	4	2	2.00	2	3	2	2		3.00	3.00	2.00	2	amlodipine	5	1 x 1		1	142.00	98.00	2.00
43	2.00	67	1.00	1	5	1	3	1.00	2	4	2	2		2.00	3.00	2.00	2	amlodipine	5	1 x 1		3	127.00	70.00	1.00
44	2.00	58	2.00	5	1	3	3	2.00	2	3	2	2		3.00	3.00	1.00	2	amlodipine	5	1 x 1		2	130.00	78.00	1.00
45	2.00	46	2.00	2	1	4	1	2.00	2	5	2	2		1.00	3.00	2.00	2	amlodipine	5	1 x 1		3	142.00	92.00	2.00
46	2.00	56	2.00	3	1	3	2	2.00	2	2	1	2		1.00	3.00	1.00	2	amlodipine	10	1 x 1		2	158.00	89.00	2.00
47	2.00	63	2.00	5	5	2	3	2.00	2	3	3	2		1.00	3.00	1.00	2	amlodipine	5	1 x 1		1	133.00	90.00	2.00
48	2.00	61	2.00	3	1	3	3	2.00	2	3	1	2		1.00	3.00	2.00	2	amlodipine	5	1 x 1		2	142.00	78.00	2.00
49	2.00	52	1.00	1	4	2	3	1.00	2	3	1	2		1.00	3.00	1.00	2	amlodipine	5	1 x 1		1	140.00	86.00	2.00
50	2.00	64	2.00	5	1	2	3	2.00	2	3	1	2		1.00	3.00	2.00	2	amlodipine	5	1 x 1		1	134.00	91.00	2.00
51	2.00	59	1.00	1	4	1	2	2.00	2	4	2	2		1.00	3.00	2.00	2	amlodipine	5	1 x 1		2	140.00	91.00	2.00
52	2.00	74	2.00	1	1	4	3	2.00	2	3	2	2		3.00	3.00	2.00	2	amlodipine	10	1 x 1		3	157.00	95.00	2.00
53	2.00	54	1.00	2	3	2	2	1.00	2	4	2	2		1.00	3.00	2.00	2	amlodipine	5	1 x 1		2	148.00	99.00	2.00
54	2.00	65	2.00	1	1	2	3	2.00	2	3	1	2		3.00	3.00	1.00	2	amlodipine	5	1 x 1		1	165.00	102.00	2.00
55	2.00	58	1.00	1	5	3	2	2.00	2	3	2	1		3.00	3.00	2.00	2	amlodipine	5	1 x 1		2	141.00	88.00	2.00
56	2.00	65	1.00	4	3	4	2	1.00	2	3	2	2		3.00	1.00	1.00	2	amlodipine	5	1 x 1		2	157.00	92.00	2.00
57	2.00	63	2.00	1	1	2	3	2.00	2	5	1	2		1.00	3.00	1.00	2	amlodipine	5	1 x 1		3	162.00	90.00	2.00
58	2.00	79	2.00	1	1	4	3	2.00	2	3	2	2		1.00	3.00	2.00	2	amlodipine	5	1 x 1		1	152.00	95.00	2.00
59	2.00	68	2.00	1	1	2	2	2.00	2	3	2	2		1.00	3.00	2.00	2	amlodipine	5	1 x 1		3	160.00	83.00	2.00
60	2.00	40	2.00	2	4	4	3	2.00	2	5	1	2		3.00	3.00	2.00	2	amlodipine	5	1 x 1		2	144.00	91.00	2.00
61	2.00	52	2.00	5	4	4	2	2.00	2	4	1	2		1.00	3.00	2.00	2	amlodipine	5	1 x 1	HCT 25 1X1	2	157.00	94.00	2.00
62	2.00	45	2.00	1	1	1	2	2.00	2	3	3	2		3.00	3.00	2.00	2	amlodipine	5	1 x 1		1	124.00	77.00	1.00
63	2.00	53	2.00	3	5	1	3	2.00	2	3	1	2		2.00	2.00	2.00	2	amlodipine	10	1 x 1		1	151.00	85.00	2.00
64	2.00	64	2.00	1	1	2	3	2.00	2	3	1	2		1.00	3.00	1.00	2	amlodipine	10	1 x 1		2	150.00	91.00	2.00
65	2.00	55	2.00	1	1	2	2	2.00	2	3	1	2		1.00	3.00	2.00	2	amlodipine	5	1 x 1		2	149.00	87.00	2.00
A1	3.00	60	1.00	4	3	2	2	1.00	2	3	2	2		1.00	1.00	2.00	2	Amlodipine	10	1x1		2	141.00	90.00	2.00
2	3.00	44	2.00	2	1	2	2	2.00	2	4	1	2		1.00	3.00	2.00	2	Amlodipine	5	3x1		2	142.00	88.00	2.00
3	3.00	88	2.00	2	1	1	3	2.00	2	1	1	2		2.00	1.00	2.00	2	Amlodipine	10	1x1		2	168.00	101.00	2.00
4	3.00	87	2.00	1	1	1	2	2.00	2	1	2	2		1.00	1.00	2.00	2	Amlodipine	5	1x1		2	161.00	97.00	2.00
5	3.00	74	1.00	2	5	1	2	1.00	2	3	2	2		3.00	1.00	2.00	2	Amlodipine	10	1x1		2	142.00	90.00	2.00
6	3.00	46	1.00	5	3	4	2	1.00	2	5	1	2		2.00	1.00	2.00	2	Amlodipine	10	1x1		2	166.00	98.00	2.00
7	3.00	45	2.00	4	1	2	1	2.00	2	5	2	2		1.00	3.00	2.00	2	amlodipine	10	1x1		3	171.00	104.00	2.00
8	3.00	50	1.00	4	3	3	2	1.00	2	5	1	2		1.00	3.00	2.00	2	amlodipine	10	1x1		1	115.00	72.00	1.00
10	3.00	65	2.00	2	1	1	3	2.00	2	3	2	2		2.00	3.00	2.00	2	amlodipine	5	1x1		1	128.00	79.00	1.00
11	3.00	73	2.00	2	1	1	2	2.00	2	3	2	2		1.00	2.00	2.00	2	Amlodipine	5	1x1		2	155.00	97.00	2.00
12	3.00	55	1.00	2	3	1	2	2.00	2	3	2	2		2.00	1.00	2.00	2	Amlodipine	10	1x1		3	140.00	84.00	2.00
13	3.00	50	2.00	3	1	3	2	2.00	2	3	2	2		1.00	3.00	2.00	2	Amlodipine	10	1x1		3	152.00	89.00	2.00
14	3.00	65	2.00	2	1	1	2	2.00	2	3	2	2		1.00	2.00	2.00	2	Amlodipine	5	1x1		3	137.00	91.00	2.00
2	3.00	52	2.00	4	1	2	2	2.00	2	5	2	2		2.00	3.00	2.00	2	Amlodipine	5	1x1		3	121.00	77.00	1.00
16	3.00	76	2.00	2	1	1	3	2.00	2	3	1	2		2.00	1.00	2.00	2	Amlodipine	5	1x1		2	158.00	91.00	2.00
17	3.00	58	2.00	4	1	1	2	2.00	2	5	2	2		2.00	3.00	2.00	2	Amlodipine	10	1x1		2	162.00	98.00	2.00
18	3.00	37	1.00	4	3	3	3	1.00	2	5	1	1		1.00	1.00	2.00	2	Amlodipine	5	1x1		3	138.00	93.00	2.00
19	3.00	61	1.00	4	4	1	2	1.00	2	3	2	1		1.00	2.00	2.00	2	Amlodipine	5	1x1		2	141.00	90.00	2.00
20	3.00	75	1.00	4	3	1	3	1.00	2	3	1	2		2.00	1.00	2.00	2	Amlodipine	5	1x1		2	154.00	95.00	2.00
21	3.00	68	2.00	2	1	2	3	2.00	2	5	1	2		3.00	1.00	2.00	2	Amlodipine	5	1x1		3	147.00	88.00	2.00
22	3.00	69	1.00	2	3	1	3	1.00	2	4	2	2		2.00	1.00	2.00	2	Amlodipine	10	1x1		1	152.00	90.00	2.00
23	3.00	57	2.00	5	2	4	3	2.00	2	3	1	2		2.00	3.00	2.00	2	Amlodipine	5	1x1		1	121.00	79.00	1.00
24	3.00	48	1.00	5	2	4	2	2.00	2	4	2	1		1.00	3.00	2.00	2	Amlodipine	5	1x1		3	118.00	75.00	1.00
25	3.00	66	2.00	2	1	1	2	2.00	2	3	1	1		1.00	1.00	2.00	2	Amlodipine	10	1x1		1	152.00	97.00	2.00
26	3.00	56	1.00	4	5	4	1	1.00	2	3	1	2		2.00	2.00	2.00	2	Amlodipine	10	1x1		2	164.00	100.00	2.00
27	3.00	65	2.00	2	1	1	2	2.00	2	4	2	2		2.00	3.00	2.00	2	Amlodipine	5	1x1		1	147.00	92.00	2.00
28	3.00	39	2.00	4	1	3	3	2.00	2	5	1	2		3.00	3.00	2.00	2	Amlodipine 10	10	1x1		3	161.00	98.00	2.00
29	3.00	56	2.00	3	1	4	2	2.00	2	3	1	1		1.00	2.00	2.00	2	Amlodipine	10	1x1		2	175.00	103.00	2.00
30	3.00	60	2.00	2	1	1	3	2.00	2	5	2	2		2.00	3.00	2.00	2	Amlodipine	5	1x1		3	131.00	89.00	2.00
31	3.00	50	2.00	4	1	4	2	2.00	2	3	2	1		1.00	2.00	2.00	1	Amlodipine	5	1x1		1	128.00	79.00	1.00
32	3.00	50	2.00	2	1	3	3	2.00	2	5	2	2		2.00	3.00	2.00	2	Amlodipine	10	1x1		3	133.00	90.00	2.00
33	3.00	76	2.00	2	5	1	3	2.00	2	3	1	2		2.00	2.00	2.00	2	Amlodipine	5	1x1		1	132.00	87.00	2.00
34	3.00	79	2.00	2	5	1	2	2.00	2	3	2	2		1.00	1.00	2.00	1	Amlodipine	5	1x1		1	164.00	92.00	2.00
35	3.00	66	2.00	1	5	1	2	2.00	2	3	2	2		1.00	2.00	2.00	2	Amlodipine	5	1x1		1	138.00	90.00	2.00
36	3.00	64	1.00	5	6	3	3	1.00	2	4	1	1		1.00	1.00	2.00	2	Amlodipine	5	3x1		1	130.00	91.00	2.00
37	3.00	52	1.00	3	3	1	3	1.00	2	3	1	1		1.00	1.00	2.00	2	Amlodipine	10	1x1		2	132.00	90.00	2.00
38	3.00	70	2.00	2	1	2	2	2.00	2	4	2	1		1.00	2.00	2.00	2	Amlodipine	5	1x1		2	140.00	90.00	2.00
41	3.00	62	1.00	4	5	4	3	1.00	2	5	2	2		1.00	1.00	1.00	2	Amlodipine	5	1x1		2	141.00	90.00	2.00
42	3.00	35	1.00	4	3	4	1	1.00	2	5	2	2		1.00	1.00	2.00	2	Amlodipine	5	1x1		2	147.00	94.00	2.00
43	3.00	56	2.00	2	1	2	2	2.00	2	5	2	1		1.00	2.00	2.00	2	Amlodipine	5	1x1		2	126.00	79.00	1.00
44	3.00	50	2.00	3	1	2	3	2.00	2	3	2	1		1.00	3.00	2.00	2	Amlodipine	5	1x1		2	150.00	92.00	2.00
45	3.00	61	1.00	3	3	3	1	1.00	2	3	2	1		1.00	1.00	2.00	2	Amlodipine	5	1x1		3	138.00	90.00	2.00
46	3.00	73	1.00	4	6	1	3	1.00	2	3	2	1		1.00	1.00	2.00	2	Amlodipine 5	5	1x1		2	135.00	88.00	2.00
47	3.00	53	2.00	1	1	1	2	2.00	2	3	2	1		1.00	1.00	2.00	2	Amlodipine	5	1x1		1	140.00	91.00	2.00
48	3.00	79	1.00	2	6	1	3	1.00	2	3	1	1		1.00	1.00	2.00	2	Amlodipine	5	1x1		1	172.00	97.00	2.00
49	3.00	57	2.00	2	1	2	2	2.00	2	3	2	1		1.00	1.00	2.00	2	Amlodipine	5	1x1		2	123.00	78.00	1.00
50	3.00	61	2.00	2	1	1	2	2.00	2	3	1	1		2.00	1.00	2.00	2	Amlodipine	5	1x1		3	120.00	90.00	2.00
ir1	4.00	54	1.00	3	3	4	1	2.00	2	4	1	2		3.00	3.00	1.00	2	AMLODIPIN	5	1 x 1		3	110.00	72.00	1.00
2	4.00	45	2.00	5	6	1	2	2.00	2	5	1	2		1.00	3.00	1.00	2	AMLODIPIN	5	1 x 1		1	105.00	79.00	1.00
3	4.00	50	2.00	1	1	1	3	2.00	2	3	1	2		2.00	3.00	1.00	2	AMLODIPIN	5	1 x 1		2	125.00	82.00	2.00
4	4.00	52	2.00	3	3	1	1	2.00	2	5	3	2		2.00	3.00	2.00	2	AMLODIPIN	5	1 x 1		2	125.00	84.00	2.00
5	4.00	60	2.00	1	1	1	1	2.00	2	4	2	2		2.00	3.00	1.00	2	AMLODIPIN	5	1 x 1		3	127.00	82.00	2.00
6	4.00	70	2.00	1	1	1	3	2.00	2	1	1	2		1.00	2.00	2.00	2	HCT	5	1 x 1		1	117.00	74.00	1.00
7	4.00	72	2.00	1	1	1	1	2.00	2	3	3	2		1.00	1.00	2.00	1	AMLODIPIN	10	1 x 1		1	120.00	76.00	1.00
8	4.00	75	1.00	1	3	1	1	2.00	2	3	1	2		3.00	3.00	1.00	2	AMLODIPIN	10	1 x 1		2	122.00	82.00	2.00
9	4.00	80	2.00	1	1	1	3	2.00	2	3	2	2		1.00	3.00	2.00	2	AMLODIPIN	5	1 x 1		1	120.00	79.00	1.00
10	4.00	60	1.00	2	6	1	2	1.00	2	5	1	2		3.00	3.00	2.00	2	AMLODIPIN	10	1 x 1		2	125.00	84.00	2.00
11	4.00	50	2.00	1	1	2	1	2.00	2	5	1	2		1.00	3.00	2.00	1	KAPTOPRIL	5	1 x 1		2	130.00	84.00	2.00
12	4.00	45	2.00	1	1	1	3	2.00	2	3	3	2		1.00	3.00	1.00	2	AMLODIPIN	10	1 x 1		2	135.00	82.00	2.00
13	4.00	58	1.00	2	1	2	3	2.00	2	4	2	2		2.00	3.00	2.00	2	AMLODIPIN	5	1 x 1		3	139.00	82.00	2.00
14	4.00	55	2.00	2	1	1	3	2.00	2	4	3	2		1.00	3.00	1.00	2	AMLODIPIN	5	1 x 1		3	132.00	81.00	2.00
15	4.00	54	2.00	3	1	1	3	2.00	2	3	3	2		1.00	3.00	2.00	2	AMLODIPIN	10	1 x 1		1	128.00	77.00	1.00
16	4.00	45	2.00	1	6	1	2	2.00	2	1	3	2		1.00	1.00	1.00	2	AMLODIPIN	5	1 x 1		1	130.00	78.00	1.00
17	4.00	75	2.00	1	1	1	1	2.00	2	3	1	2		1.00	2.00	2.00	2	AMLODIPIN	5	1 x 1		2	139.00	84.00	2.00
18	4.00	54	2.00	3	1	1	3	2.00	2	3	3	2		2.00	1.00	2.00	2	AMLODIPIN	5	1 x 1		1	122.00	76.00	1.00
19	4.00	50	2.00	1	1	2	3	2.00	2	4	1	2		2.00	3.00	2.00	2	AMLODIPIN	5	1 x 1		2	130.00	82.00	2.00
20	4.00	45	2.00	1	1	1	3	2.00	2	5	3	2		1.00	3.00	2.00	2	AMLODIPIN	10	1 x 1		1	135.00	80.00	2.00
21	4.00	48	2.00	2	1	1	2	2.00	2	3	2	2		3.00	3.00	2.00	2	AMLODIPIN	10	1 x 1		1	138.00	82.00	2.00
22	4.00	62	2.00	1	1	1	3	1.00	2	3	2	2		1.00	3.00	2.00	2	AMLODIPIN	5	1 x 1		1	125.00	78.00	1.00
23	4.00	63	2.00	2	1	1	1	2.00	2	3	1	2		1.00	3.00	2.00	2	AMLODIPIN	5	1 x 1		1	130.00	84.00	2.00
24	4.00	72	2.00	1	5	1	1	2.00	2	4	1	2		1.00	3.00	2.00	2	AMLODIPIN	5	1 x 1		1	135.00	80.00	2.00
25	4.00	70	2.00	1	1	1	1	2.00	2	3	3	2		1.00	3.00	2.00	2	AMLODIPIN	5	1 x 1		3	130.00	82.00	2.00
26	4.00	74	2.00	3	1	1	3	2.00	2	3	1	2		1.00	3.00	2.00	1	KAPTOPRIL	5	1 x 1		3	131.00	90.00	2.00
27	4.00	80	1.00	2	6	3	1	2.00	2	3	1	2		1.00	2.00	2.00	2	AMLODIPIN	5	1 x 1		1	137.00	95.00	2.00
28	4.00	46	2.00	1	1	1	1	2.00	2	5	1	1		2.00	1.00	2.00	2	AMLODIPIN	5	1 x 1		1	142.00	99.00	2.00
29	4.00	85	1.00	2	6	1	1	2.00	2	3	1	2		2.00	1.00	2.00	2	AMLODIPIN	5	1 x 1		1	145.00	97.00	2.00
30	4.00	76	2.00	2	1	1	3	2.00	2	1	2	2		3.00	2.00	2.00	2	AMLODIPIN	5	1 x 1		1	150.00	91.00	2.00
31	4.00	61	2.00	1	1	1	3	2.00	2	3	2	2		1.00	3.00	2.00	1	HCT	25	1 x 1		2	142.00	86.00	2.00
32	4.00	45	2.00	1	1	2	1	2.00	2	4	1	2		1.00	1.00	2.00	2	AMLODIPIN	10	1 x 1		1	146.00	90.00	2.00
33	4.00	54	2.00	1	1	1	3	2.00	2	4	1	2		2.00	1.00	2.00	2	AMLODIPIN	5	1 x 1		2	145.00	95.00	2.00
34	4.00	52	2.00	1	1	1	1	2.00	2	3	2	2		3.00	3.00	2.00	2	AMLODIPIN	10	1 x 1		2	141.00	88.00	2.00
35	4.00	53	2.00	4	1	2	1	2.00	2	3	3	2		3.00	3.00	2.00	2	AMLODIPIN	5	1 x 1		2	156.00	93.00	2.00
36	4.00	54	2.00	3	1	3	1	2.00	2	3	3	2		3.00	3.00	1.00	2	AMLODIPIN	10	1 x 1		2	142.00	90.00	2.00
37	4.00	60	2.00	1	1	1	3	2.00	2	3	2	2		2.00	3.00	2.00	2	AMLODIPIN	5	1 x 1		3	155.00	89.00	2.00
38	4.00	75	1.00	1	3	2	3	2.00	2	3	2	2		2.00	3.00	2.00	2	AMLODIPIN	5	1 x 1		3	156.00	95.00	2.00
39	4.00	48	1.00	3	6	3	2	2.00	2	5	2	2		2.00	3.00	2.00	2	AMLODIPIN	10	1 x 1		1	144.00	90.00	2.00
40	4.00	53	2.00	1	1	2	3	2.00	2	3	3	2		1.00	3.00	2.00	2	AMLODIPIN	5	1 x 1		1	142.00	89.00	2.00
41	4.00	55	1.00	3	3	2	1	2.00	2	5	1	2		1.00	3.00	2.00	2	AMLODIPIN	5	1 x 1		1	138.00	92.00	2.00
42	4.00	50	1.00	1	3	1	3	2.00	2	3	3	2		1.00	3.00	2.00	2	AMLODIPIN	5	1 x 1		1	150.00	95.00	2.00
43	4.00	52	2.00	1	3	1	3	2.00	2	5	3	2		1.00	3.00	2.00	2	AMLODIPIN	5	1 x 1		1	155.00	95.00	2.00
44	4.00	58	2.00	1	1	1	1	2.00	2	3	1	2		1.00	3.00	2.00	2	AMLODIPIN	10	1 x 1		2	140.00	88.00	2.00
45	4.00	59	2.00	1	1	2	1	2.00	2	4	1	2		1.00	3.00	2.00	2	AMLODIPIN	10	1 x 1		1	143.00	97.00	2.00
46	4.00	54	2.00	1	4	1	1	2.00	2	5	1	2		2.00	3.00	2.00	2	AMLODIPIN	5	1 x 1		2	137.00	89.00	2.00
47	4.00	49	2.00	1	6	4	3	2.00	2	5	3	2		3.00	3.00	2.00	2	AMLODIPIN	5	1 x 1		1	142.00	90.00	2.00
48	4.00	50	2.00	1	6	1	1	2.00	2	3	3	2		1.00	3.00	2.00	2	AMLODIPIN	5	1 x 1		1	140.00	97.00	2.00
49	4.00	47	1.00	3	6	3	3	2.00	2	3	3	2		2.00	1.00	2.00	2	AMLODIPIN	5	1 x 1		1	140.00	91.00	2.00
50	4.00	62	2.00	2	3	1	2	2.00	2	3	3	2		1.00	3.00	2.00	2	AMLODIPIN	5	1 x 1		2	165.00	90.00	2.00
51	4.00	63	1.00	2	6	2	1	2.00	2	3	1	1		1.00	3.00	2.00	2	AMLODIPIN	10	1 x 1		2	162.00	100.00	2.00
52	4.00	45	2.00	2	1	2	1	2.00	2	5	3	2		3.00	3.00	2.00	1	KAPTOPRIL	5	1 x 1		2	160.00	109.00	2.00
53	4.00	65	2.00	2	1	2	3	2.00	2	3	1	2		1.00	3.00	2.00	2	AMLODIPIN	5	1 x 1		1	170.00	104.00	2.00
54	4.00	55	2.00	2	1	4	3	2.00	2	5	3	2		3.00	3.00	2.00	2	AMLODIPIN	5	1 x 1		3	168.00	100.00	2.00
55	4.00	52	2.00	3	1	1	1	2.00	2	3	3	2		3.00	3.00	2.00	2	AMLODIPIN	5	1 x 1		3	160.00	110.00	2.00
56	4.00	50	2.00	3	1	1	3	2.00	2	3	3	2		1.00	1.00	2.00	2	AMLODIPIN	10	1 x 1		2	162.00	110.00	2.00
57	4.00	47	2.00	3	1	1	1	2.00	2	5	1	2		3.00	3.00	2.00	1	HCT	25	1 x 1		2	162.00	110.00	2.00
58	4.00	45	2.00	5	1	1	3	2.00	2	3	2	2		2.00	3.00	2.00	2	AMLODIPIN	5	1 x 1		1	164.00	99.00	2.00
59	4.00	57	2.00	2	1	2	3	2.00	2	5	3	2		2.00	3.00	1.00	2	AMLODIPIN	5	1 x 1		2	185.00	100.00	2.00
60	4.00	82	2.00	4	1	4	2	2.00	2	3	1	2		3.00	3.00	2.00	2	AMLODIPIN	5	1 x 1		2	188.00	110.00	2.00
El1	5.00	63	2.00	1	6	1	3	2.00	2	3	2	2		1.00	2.00	2.00	1	Captopril				3	130.00	85.00	2.00
2	5.00	67	1.00	3	6	1	3	1.00	2	3	1	2		1.00	1.00	2.00	1	Amlodipin				1	120.00	77.00	1.00
3	5.00	71	2.00	1	1	1	1	2.00	2	4	2	2		1.00	3.00	2.00	2	Amlodipin				1	124.00	70.00	1.00
4	5.00	60	1.00	3	6	1	3	1.00	2	3	3	2		1.00	1.00	2.00	2	Amlodipin				2	150.00	88.00	2.00
5	5.00	74	1.00	3	6	2	3	1.00	2	3	3	2		2.00	1.00	2.00	2	Captopril				2	147.00	92.00	2.00
6	5.00	72	2.00	2	1	2	3	2.00	2	3	2	2		2.00	2.00	2.00	2	Amlodipin				2	110.00	75.00	1.00
7	5.00	77	1.00	2	6	1	3	1.00	2	3	1	1		2.00	2.00	2.00	2	Amlodipin				3	132.00	95.00	2.00
8	5.00	63	1.00	3	1	2	1	1.00	2	3	2	2		1.00	1.00	2.00	2	Amlodipin				1	127.00	78.00	1.00
9	5.00	50	2.00	2	1	1	1	1.00	2	3	1	1		3.00	1.00	2.00	2	Captopril				3	141.00	90.00	2.00
10	5.00	47	2.00	4	3	2	3	2.00	2	3	3	2		2.00	1.00	2.00	2	Amlodipin				2	125.00	76.00	1.00
11	5.00	73	2.00	4	1	2	3	2.00	2	3	3	1		1.00	1.00	1.00	2	Amlodipin				3	132.00	87.00	2.00
12	5.00	61	1.00	3	4	4	1	1.00	2	3	1	2		1.00	2.00	2.00	2	Captopril				3	137.00	90.00	2.00
13	5.00	81	2.00	2	1	1	3	2.00	2	3	2	1		2.00	1.00	2.00	2	Captopril				1	112.00	70.00	1.00
14	5.00	69	2.00	2	1	2	3	2.00	2	4	1	2		1.00	1.00	1.00	2	Amlodipin				1	115.00	75.00	1.00
15	5.00	58	2.00	2	1	1	3	2.00	2	3	3	2		1.00	1.00	2.00	2	Amlodipin				2	122.00	79.00	1.00
16	5.00	60	1.00	3	6	2	1	2.00	2	3	1	2		1.00	1.00	2.00	2	Captopril				1	127.00	78.00	1.00
17	5.00	75	2.00	2	1	1	3	2.00	2	3	2	1		1.00	1.00	2.00	1	Amlodipin				1	142.00	91.00	2.00
18	5.00	63	2.00	2	1	1	3	2.00	2	3	1	2		2.00	2.00	2.00	2	Amlodipin				3	140.00	82.00	2.00
19	5.00	72	2.00	5	1	1	3	2.00	2	3	2	2		2.00	1.00	2.00	2	Amlodipin				2	120.00	79.00	1.00
20	5.00	55	2.00	5	6	1	3	2.00	2	3	2	2		2.00	1.00	2.00	2	Amlodipin				2	128.00	76.00	1.00
21	5.00	65	2.00	1	1	1	3	2.00	2	3	1	2		2.00	1.00	2.00	2	Captopril				3	125.00	78.00	1.00
22	5.00	69	2.00	3	1	1	3	2.00	2	3	1	2		2.00	2.00	2.00	2	Captopril				1	150.00	94.00	2.00
23	5.00	75	1.00	3	6	4	3	2.00	2	3	1	2		1.00	3.00	2.00	2	Amlodipin				3	120.00	75.00	1.00
24	5.00	63	2.00	1	1	1	3	2.00	2	3	1	2		2.00	2.00	2.00	2	Amlodipin				1	119.00	74.00	1.00
25	5.00	77	2.00	2	1	1	3	2.00	2	3	1	2		1.00	1.00	2.00	2	Amlodipin				2	120.00	79.00	1.00
26	5.00	45	2.00	5	1	1	3	2.00	2	3	2	2		3.00	1.00	2.00	2	Amlodipin				2	160.00	96.00	2.00
27	5.00	75	2.00	1	6	1	3	2.00	2	2	1	1		1.00	1.00	2.00	2	Captopril				1	140.00	83.00	2.00
28	5.00	63	1.00	4	1	4	3	1.00	2	3	1	2		1.00	1.00	2.00	2	Amlodipin				2	129.00	77.00	1.00
29	5.00	76	2.00	1	1	1	3	2.00	2	3	2	2		1.00	1.00	2.00	1	Captopril				1	128.00	94.00	2.00
30	5.00	60	2.00	5	1	2	3	2.00	2	4	2	2		3.00	1.00	2.00	2	Amlodipin				2	140.00	85.00	2.00
31	5.00	54	2.00	3	1	3	1	2.00	2	2	2	2		1.00	1.00	2.00	2	Amlodipin				2	140.00	96.00	2.00
32	5.00	54	2.00	3	1	2	3	1.00	2	3	1	2		1.00	2.00	2.00	2	Amlodipin				2	137.00	90.00	2.00
33	5.00	61	2.00	3	1	4	3	2.00	2	2	2	2		3.00	2.00	2.00	2	Amlodipin				2	124.00	76.00	1.00
34	5.00	65	1.00	2	6	1	3	1.00	2	3	1	2		1.00	2.00	2.00	2	Captopril				1	150.00	91.00	2.00
35	5.00	65	2.00	2	6	2	3	2.00	2	3	2	2		1.00	2.00	2.00	2	Captopril				1	130.00	79.00	1.00
36	5.00	83	2.00	5	1	1	3	2.00	2	4	3	2		2.00	2.00	2.00	1	Amlodipin				2	162.00	97.00	2.00
37	5.00	60	1.00	2	6	1	1	1.00	2	4	1	2		1.00	1.00	1.00	2	Amlodipin				2	154.00	80.00	2.00
38	5.00	46	2.00	5	1	1	3	2.00	2	3	2	2		2.00	3.00	2.00	2	Amlodipin				1	127.00	75.00	1.00
39	5.00	66	2.00	1	1	1	3	2.00	2	3	2	2		3.00	1.00	1.00	2	Amlodipin				2	129.00	78.00	1.00
40	5.00	54	2.00	3	1	1	3	2.00	2	3	1	2		2.00	2.00	1.00	2	Amlodipin				1	120.00	78.00	1.00
41	5.00	67	2.00	3	6	3	1	2.00	2	4	3	2		2.00	1.00	2.00	2	Amlodipin				3	128.00	77.00	1.00
42	5.00	45	2.00	2	1	2	3	2.00	2	4	1	2		1.00	1.00	1.00	2	Amlodipin				3	140.00	84.00	2.00
43	5.00	60	2.00	2	1	1	3	2.00	2	4	1	2		2.00	1.00	2.00	2	Amlodipin				2	139.00	87.00	2.00
44	5.00	55	1.00	3	4	2	1	1.00	2	3	1	2		1.00	1.00	2.00	2	Amlodipin				1	147.00	90.00	2.00
45	5.00	60	2.00	5	1	1	3	2.00	2	3	2	2		2.00	1.00	2.00	2	Amlodipin				1	129.00	79.00	1.00
46	5.00	57	2.00	3	1	1	1	2.00	2	3	2	2		2.00	1.00	2.00	2	Amlodipin				3	151.00	93.00	2.00
47	5.00	62	1.00	3	4	1	3	1.00	2	3	2	2		2.00	2.00	2.00	2	Captopril				2	120.00	72.00	1.00
48	5.00	55	1.00	1	3	1	3	1.00	2	3	1	2		2.00	1.00	2.00	1	Amlodipin				1	127.00	77.00	1.00
49	5.00	61	2.00	5	1	1	3	2.00	2	3	2	2		2.00	1.00	2.00	2	Amlodipin				1	143.00	90.00	2.00
50	5.00	45	2.00	2	1	1	1	2.00	2	3	1	2		2.00	1.00	1.00	2	Amlodipin				1	130.00	78.00	1.00
51	5.00	60	1.00	3	6	2	3	1.00	2	3	2	2		2.00	1.00	2.00	2	Amlodipin				1	130.00	91.00	2.00
52	5.00	60	2.00	5	1	1	3	2.00	2	3	2	2		2.00	1.00	2.00	2	Amlodipin				2	117.00	72.00	1.00
53	5.00	50	2.00	1	3	1	1	2.00	2	3	1	2		2.00	1.00	1.00	2	Amlodipin				2	121.00	77.00	1.00
54	5.00	71	1.00	5	6	1	3	2.00	2	3	2	1		1.00	1.00	2.00	2	Amlodipin				1	126.00	75.00	1.00

## Sheet: Codebook
Name	Values
Patient code	None
PHC group code	1=PHC A, 2=PHC B, 3=PHC C, 4=PHC D, 5=PHC E
age	None (years)
gender	1, male; 2, female
Education	1, primary level; 2, lower secondary level; 3, upper secondary level; 4, university level; 5, no schooling
Occupation	1, housewife; 2, civil servants; 3, private sector employee; 4, private sector employer; 5, not working; 6, others
Income	1, <1 million IDR; 2, 1-2 million IDR; 3, 2-3 million IDR; 4, >3 million IDR
Duration of HT	1, less than 1 year ; 2, 1-5 years; 3, more than 5 years
smoking	1, smoker (current, prior); 2, non-smoker
alcohol	1, yes; 2, no
salty_food	1, never or rarely; 2, sometimes; 3, regularly/always
add_salt	1, never or rarely; 2, sometimes; 3, regularly/always
BMI	1, <17; 2, 17-<18.5; 3, 18.5-23; 4, >23-27.5; 5, >27.5
physical activity	1, adequate; 2, inadequate
Family history	1, no; 2, don’t know; 3, yes
CV complications	1, yes; 2 no
DM	1, yes; 2 no
Adherence (MGLS)	1, high; 2, moderate; 3, low
BP control	1, yes; 2, no
